# Supplementary material for: Basket trials in oncology: a systematic review of practices and methods, comparative analysis of innovative methods, and an appraisal of a missed opportunity
Source: Front Oncol. 2023 Nov 14;13:1266286. doi: 10.3389/fonc.2023.1266286 (PMC10684308; doi:10.3389/fonc.2023.1266286)
Supplement: Supplementary file 2 [file DataSheet_2.xlsx]

## Sheet: Basket Trial Practice
Registry ID	Study Acronym	Source URL	Trial Status	Phase	N	# of Indications	# Basket	Proposed Study Duration (months)	Molecular Class	# Prior LoT	Age of Population	# Clinical Centers	Geographic Location of Basket Trial	Evaluation Method	Key Design Features	Type of Treatment Regimen	Multiple Dosing Regimens (Y/N)	ORR an Endpoint (Y/N)	Notes
NCT04122625	SMARTPLUS-106	https://clinicaltrials.gov/ct2/show/NCT04122625	Completed	Ib/II	46	7	4	37	MSI-H/MMRd, BRCA1/2, PD-1	>= 1	18+	17	USA, France, Spain	Naïve pooling	Sequential assignment	Combination therapy	Yes (dose optimization in Part A, RP2D in Part B)	Yes (Part B)	Part A is dose optimization to determine the RP2D, Part B is the basket trial using the RP2D
NCT02454972		https://clinicaltrials.gov/ct2/show/NCT02454972	Completed	II	345	9+	9	62	BRCA 1/2 (Cohort 4); N/A (Cohorts 1-3)	>= 1 (SCLC, EC); 1-2 (H&N, NETs, biliary tract, CUP); no limit (GCTs); <= 2 (EFTs); 1-3 (mBC)	18+	40	USA, Belgium, France, Germany, Italy, Spain, Sweden, Switzerland, UK	Within basket	Single group assignment	Monotherapy	No	Yes
NCT03157128	LIBRETTO-001	https://clinicaltrials.gov/ct2/show/NCT03157128	Recruiting	I/II	875	3+		89	RET gene alteration	>= 1 (with exceptions)	12+	85	USA, Australia, Canada, Denmark, France, Germany, Honng Kong, Israel, Italy, Japan, Korea, Singapore, Spain, Switzerland, Taiwan, UK		Single group assignment	Monotherapy	Yes (dose escalation in Phase I, RP2D in Phase II)	Yes (Phase II)	Phase I is dose escalation to determine the RP2D, Phase II is expansion using the RP2D
NCT02715284	GARNET	https://clinicaltrials.gov/ct2/show/NCT02715284	Recruiting	I	740	5+		140	PD-1, dMMR/MSI-H, MMR-proficient/MSS, no BRCA mutation	1-2 (with exceptions)	18+	106	USA, Canada, Czechia, Denmark, France, ItalyPoland, Spain, UK		Sequential assignment	Monotherapy	Yes (dose escalation in Part 1, two dosing regimens in Part 2A, one dosing regimen in Part 2B)	Yes (Part 2B by cohort)	Part 1 is dose escalation, Part 2A is fixed-dose safety evalutation (two dosing regimens), Part 2B is expansion (one dosing regimen)
NCT04276376	ARIANES	https://clinicaltrials.gov/ct2/show/NCT04276376	Suspended	II	1000	6+		73	mCRPC, ATM, BARD1, BRCA2, BRIP1, CDK12, CHEK2, PALB2, RAD51C, RAD51D, FANCA, NBN, RAD51, RAD54L	No restrictions	18+	1	France		Single group assignment	Combination therapy	No	Yes
NCT02721732		https://clinicaltrials.gov/ct2/show/NCT02721732	Active, not recruiting	II	202	10+		77	N/A (no biomarker given)	>= 1 with exceptions (within 6 months of consent date)	18+	1	USA		Single group assignment	Monotherapy	No	Yes
NCT02506517	MOBILITY-003	https://clinicaltrials.gov/ct2/show/NCT02506517	Active, not recruiting	II	30	>1		90	HER	No restrictions	18+	1	Canada		Single group assignment	Monotherapy	No	No, but ORR can be derived from the two primary endpoints (number of patients with complete/partial response)
NCT03827837		https://clinicaltrials.gov/ct2/show/NCT03827837	Recruiting	II	265	5		48	PD-1	>= 1 (renal cell carcinoma, cervical cancer); <= 2 (urothelial carcinoma); standard therapies are not effective or do not exist (ovarian cancer, endometrial cancer)	18+	1	China		Adaptive two-stage, single group assignment	Combination therapy	No	Yes
NCT02644369	INSPIRE	https://clinicaltrials.gov/ct2/show/NCT02644369	Active, not recruiting	II	100	5+		94	PD-L1	>= 1 (with exceptions)	18+	1	Canada		Single group assignment	Monotherapy	No	Yes
NCT02938793		https://clinicaltrials.gov/ct2/show/NCT02938793	Recruiting	II	150	>1		97	PD-1-L1, CTLA-4	>= 1 (with exceptions)	18+	1	USA		Single group assignment	Combination therapy	No	No, but primary endpoint is antitumor activity based on irRC
NCT04357873	PEVOsq	https://clinicaltrials.gov/ct2/show/NCT04357873	Active, not recruiting	II	112	6		49	N/A (no biomarker given)	No restrictions	18+	14	France		Single group assignment	Combination therapy	No	Yes
NCT01631552		https://clinicaltrials.gov/ct2/show/NCT01631552	Completed	I/II	515	16+	3	93	N/A (no biomarker given)	>= 1	18+	12	USA	Within basket	Sequential assignment	Monotherapy	Yes (dose exploration in Phase I, RP2D in Phase II)	Yes	Phase I is dose exploration to determine the RP2D, Phase II is evaluate safety and efficacy using the RP2D
NCT01037790		https://clinicaltrials.gov/ct2/show/NCT01037790	Completed	II	304	4+	5	121	Kras, BRAF, CDK4/6, CCND1, CCND2	No restrictions	18+	1	USA	Within basket	Single group assignment	Monotherapy	No	Yes
NCT02034110	ROAR	https://clinicaltrials.gov/ct2/show/NCT02034110; https://doi.org/10.1200/jco.2017.73.6785	Completed	II	206	9	5	94	BRAF V600E	Standard therapies are not effective or do not exist	18+	52	USA, Austria, Belgium, Canada, Denmark, France, Germany, Italy, Japan, Korea, Netherlands, Norway, Sweden, Spain	Bayesian hierarchical model	Single group assignment	Combination therapy	No	Yes
NCT03838042	INFORM2 NivEnt	https://clinicaltrials.gov/ct2/show/NCT03838042	Recruiting	I/II	128	10+		62	SNV load, PDL1 mRNA expression, MYC/N amplification	Standard therapies are not effective or do not exist	6-21	14	Australia, Austria, France, Germany, Netherlands, Sweden, Switzerland		Single group assignment	Combination therapy	Yes (dose exploration in Phase I, RP2D in Phase II)	No, but ORR can be derived using the primary endpoint for Phase II (best response)	Phase I is dose exploration to determine the RP2D, Phase II is to evaluate safety and efficacy using the RP2D
NCT02675829		https://clinicaltrials.gov/ct2/show/NCT02675829	Recruiting	II	140	4+		97	HER2	No restrictions	18+	7	USA		Simon's optimal two stage, parallel assignment	Monotherapy	No	Yes
NCT03363217	TRAM-01	https://clinicaltrials.gov/ct2/show/NCT03363217	Active, not recruiting	II	114	2+		104	KIAA1549-BRAF, MAPK/ERK	>= 1 (with exceptions)	1 month - 25 years	7	Canada		Parallel assignment	Monotherapy	No	Yes
NCT03872427	BeGIN	https://clinicaltrials.gov/ct2/show/NCT03872427	Active, not recruiting	II	108	>1		49	NF1, KEAP1/NFR2, STK11/LKB1	No prior LoT allowed	18+	31	USA		Single group assignment	Monotherapy	No	Yes
NCT03915678	AGADIR	https://clinicaltrials.gov/ct2/show/NCT03915678	Recruiting	II	247	5+		49	PD-1/L1	No restrictions	18+	11	France		Simon's optimal two stage, parallel assignment	Monotherapy	No	Yes (by cancer type)	Six independent, single-arm phase II trials conducted in parallel in six distinct populations of solid tumors
NCT05012397		https://clinicaltrials.gov/ct2/show/NCT05012397	Recruiting	II	65	15+		34	TP53, MDM2	>= 1 (with exceptions)	18+	14	USA		Single group assignment	Monotherapy	No	Yes
NCT04064359		https://clinicaltrials.gov/ct2/show/NCT04064359	Recruiting	I	150	>1		66	CD205	>= 1 (with exceptions)	18+	11	USA, Belgium, France		Single group assignment	Monotherapy	Yes (dose escalation in Part A, efficacy assessment of doses at or below MTD in Part B, RP2D in Part C)	Yes (no details to indicate if this is just for Part C)	Part A is the dose escalation phase to determine the MTD, Part B is the expansion phase to assess the safety and efficacy of doses at or below the MTD, Part C studies efficacy of the RP2D
NCT05077709		https://clinicaltrials.gov/ct2/show/NCT05077709	Recruiting	II	90	3		34	PD-L1	No prior LoT allowed	18+	19	USA, UK, Spain		Single group assignment	Combination therapy	No	Yes
NCT04346381		https://clinicaltrials.gov/ct2/show/NCT04346381	Active, not recruiting	II	286	>1		27	N/A (no biomarker given)	No restrictions	18-75	1	China		Single group assignment	Combination therapy	No	Yes
NCT01524926	CREATE	https://clinicaltrials.gov/ct2/show/NCT01524926	Completed	II	582	>1	12	122	ALK, MET	Standard therapies are not effective or do not exist	1+	25	Belgium, France, Germany, Italy, Netherlands, Norway, Poland, Slovakia, Slovenia, UK	Within basket	Simon's optimal two stage, parallel assignment	Monotherapy	Yes (determined by age group and toxicity)	No, the primary outcome is "antitumor activity", unclear if this relates to response ("duration of response" is a secondary outcome)	Doses are different for patients aged 15+ versus <15, and dose depends on toxicity
NCT04174716	VASTUS	https://clinicaltrials.gov/ct2/show/NCT04174716	Active, not recruiting	Ib/IIa	310	>1		50	HRR	>= 1 (with exceptions)	19+	18	Korea		Single group assignment	Monotherapy	Yes (dose selection in Phase Ib, RP2D in Phase IIa)	Yes (no details if this is just Phase IIa)	Phase Ib is dose selection to determine RP2D, Phase IIa is parallel dose expansion to confirm RP2D
NCT04042480		https://clinicaltrials.gov/ct2/show/NCT04042480	Terminated	I	88	6		43	HER2, PD-1	>= 2 (colorectal cancer); >= 1 (other cancers)	18+	14	USA, France, Italy, Spain, UK		Single group assignment	Monotherapy	Yes (dose exploration in Part 1, best dose regimen in Part 2)	Yes (no details if this is just Part 2)	Part 1 identifies best dosing regimen, Part 2 looks at safety and efficacy of that dose regimen
NCT03991832	SOLID	https://clinicaltrials.gov/ct2/show/NCT03991832	Recruiting	II	58	2+		64	IDH	<= 2	18+	1	Canada		Parallel assignment	Combination therapy	No	Yes
NCT02912949	eNRGy	https://clinicaltrials.gov/ct2/show/NCT02912949	Recruiting	I/II	250	3+		120	HER2/HER3, NRG1	>= 1 (with exceptions)	18+	59	USA, Austria, Belgium, Canada, France, Germany, israel, Italy, Japan, Korea, Netherlands, Norway, Singapore, Spain, Sweden, Taiwan, UK		Parallel assignment	Monotherapy	Yes (dose escalation in Part I)	Yes (no details if this is just Part 2)	Part 1 is dose escalation, Part 2 is dose expansion
NCT03037385	ARROW	https://clinicaltrials.gov/ct2/show/NCT03037385	Active, not recruiting	I/II	589	15+		82	RET	>= 1 (with exceptions, 0 for groups 2 and 4)	18+	66	USA, China, France, Germany, Hong Kong, Korea, Netherlands, Singapore,Pain, Taiwan, UK		Parallel assignment	Monotherapy	Yes (dose escalation in Phase I)	Yes (Phase II)	Phase I is dose escalation, phase II is dose expansion
NCT03834220	FUZE	https://clinicaltrials.gov/ct2/show/NCT03834220	Terminated	II	63	>1		35	FGFR1-3	No restrictions	18+	105	USA, Australia, Austria, Brazil, Bulgaria, Croatia, Czechia, Denmaek, Finland, France, Greece, Korea, Netherlands, Norway, Philippines, Poland, Romania, Russian Federation, Singapore, Spain, Taiwan, Ukraine, UK		Single group assignment	Monotherapy	No	Yes
NCT03518606	MOVIE	https://clinicaltrials.gov/ct2/show/NCT03518606	Active, not recruiting	I/II	150	4+		79	N/A (no biomarker given)	Standard therapies are not effective or do not exist	18+	9	France		Parallel assignment	Combination therapy	Yes (dose escalation in Phase I)	No, but CBR is primary outcome for Phase II	Phase I is dose escalation to determine the MTD and the RP2D, Phase II is activity study
NCT02478320	NCI CTRP	https://clinicaltrials.gov/ct2/show/NCT02478320	Completed	II	12	>1		70	CDKN2A	Standard therapies are not effective or do not exist	18+	1	USA		Single group assignment	Monotherapy	No	Yes
NCT03428802		https://clinicaltrials.gov/ct2/show/NCT03428802	Recruiting	II	40	2+		68	POLE, POLD1, BRCA1/2, PD-L1	No restrictions	18+	2	USA		Single group assignment	Monotherapy	No	Yes
NCT03810872	PRECISION 2	https://clinicaltrials.gov/ct2/show/NCT03810872	Unknown	II	87	>1		67	EGFR, HER2/3	>= 1	18+	5	Belgium		Simon's optimal two stage, single group assignment	Combination therapy	Yes (dose starts at the same daily amount but is later adjusted depending on whether adverse events occur and at progression)	Yes	EudraCT No: 2016-003411-34 -- EudraCT states trial is ongoing, CT.gov states estimated study completion data as Dec 2022 and has not been updated since 2019; details on dose: "dose: Starting dose of afatinib at 40 mg/day. Dose increase to 50 mg in the absence of adverse events. Stepwise dose reduction to 30, 20, 10 mg/day according to drug-related adverse events"
NCT03982173	MATILDA	https://clinicaltrials.gov/ct2/show/NCT03982173	Withdrawn	II	0	5		52	PDL1, CTLA4	>= 1 (with exceptions)	18+		N/A		Single group assignment	Combination therapy	No	Yes
NCT05483400	TIRACAN	https://clinicaltrials.gov/ct2/show/NCT05483400	Not yet recruiting	II	97	3+		58	dMMR/MSI-H	No restrictions	18+		--		Simon's two stage, single group assignment	Combination therapy	No	Yes (3 of 4 cohorts)
NCT05221320		https://clinicaltrials.gov/ct2/show/NCT05221320	Recruiting	II	215	5		26	MAPK, KRAS, NRAS, HRAS, BRAF non-V600, MEK, ERK	>= 1 (cholangiocarcinoma and pancreatic adenocarcinoma); >= 2 (other cancers)	18+	8	USA		Simon's two stage, sequential assignment	Combination therapy	No	Yes
NCT05643417		https://clinicaltrials.gov/ct2/show/NCT05643417	Not yet recruiting	I	80	7+		23	N/A (no biomarker given)	>= 1	18+	1	China		Parallel assignment	Combination therapy	No	Yes	Despite being Phase I, the trial does not appear to have dose exploration as an objective
NCT04534283		https://clinicaltrials.gov/ct2/show/NCT04534283	Recruiting	II	35	>1		46	ERK1/2, BRAF, RAF1, MEK1/2, NF1	>= 1 (with exceptions)	18+	1	USA		Single group assignment	Combination therapy	No	Yes
NCT05724563		https://clinicaltrials.gov/ct2/show/NCT05724563	Not yet recruiting	II	58	2+		48	N/A (no biomarker given)	>= 1 (with exceptions)	18+				Single group assignment	Combination therapy	No	Yes
NCT04400474	CABATEN	https://clinicaltrials.gov/ct2/show/NCT04400474	Active, not recruiting	II	93	6		42	VEGF, PD-L1	>= 1	18+	15	Spain		Single group assignment	Combination therapy	No	Yes
NCT05152797		https://clinicaltrials.gov/ct2/show/NCT05152797	Not yet recruiting	I/II	91	4		60	N/A (no biomarker given)	>= 2 (with exceptions)	18-75				Single group assignment	Monotherapy	No dosing information provided	Yes	Treatment is a biological
NCT05329792	IntriNSiC	https://clinicaltrials.gov/ct2/show/NCT05329792	Not yet recruiting	II	70	7		22	N/A (no biomarker given)	No restrictions (KA, MATS); >= 1 with exceptions (other cancers)	18-100	8	France, Italy		Single group assignment	Combination therapy	Yes (dosing depends on size and number of lesions)	Yes
NCT04722133		https://clinicaltrials.gov/ct2/show/NCT04722133	Unknown	II	34	3		34	HER2+	1--2	19+	1	Korea		Single group assignment	Combination therapy	No	Yes
NCT04594005		https://clinicaltrials.gov/ct2/show/NCT04594005	Active, not recruiting	Ib/II	36	>1		19	CDK4/6	>= 1	19+	1	Korea		Single group assignment	Combination therapy	Yes (dose escalation in Phase Ib, RP2D in Phase II)	Yes (no details if the ORR is just for Phase II)	Phase Ib is dose escalation to determine the RP2D, Phase II is the expansion using the RP2D
NCT05749900	HERBOT	https://clinicaltrials.gov/ct2/show/NCT05749900	Not yet recruiting	Ib/II	44	2+		48	HER2+	>= 1 (with exceptions)	19+/20+ (both reported on CT.gov)	1	Korea		Single group assignment	Combination therapy	Yes (dose exploration in Phase Ib)	Yes (Phase II)	Phase Ib is dose exploration to determine the RP2D, Phase II is likely expansion (no details to confirm aside from the primary object of Phase Ib being to identify the RP2D and the primary objective of Phase II being ORR)
NCT04617054		https://clinicaltrials.gov/ct2/show/NCT04617054	Recruiting	II	40	>1		67	NTRK1/2/3	>= 1 (with exceptions)	18+	1	China		Single group assignment	Monotherapy	No	Yes
NCT05745623		https://clinicaltrials.gov/ct2/show/NCT05745623	Recruiting	II	55	2+		49	NTRK	No restrictions	18+	1	China		Single group assignment	Monotherapy	No	Yes
NCT00928525	BASKET 1	https://clinicaltrials.gov/ct2/show/NCT00928525	Unknown	II	35	2		140	KIT, DGFRα PDGFRβ and/or PDGFα or PDGFβ	No restrictions	18-80	7	Italy		Single group assignment	Monotherapy	No	Yes
NCT04266912	D-BOB	https://clinicaltrials.gov/ct2/show/NCT04266912	Recruiting	I/II	36	>1		55	ARID1A, ATM, ATR, ATRX, BAP1, BARD1, BRCA1/2, BRIP1, CDK12, CHEK2, FANCA, FANCC, FANCD2, FANCE, FANCF, FANCM, MRE11A, MSH2, NBN (NBS1), PALB2, RAD51, RAD51C, RAD51D, SMARCB1, VHL	>= 1 (with exceptions)	18+	1	USA		Single group assignment	Combination therapy	Yes (dose escalation in Phase I, RP2D in Phase II)	No (Response rate is a secondary outcome)	Phase I is dose escalation to determine the MTD and RP2D, few details about the design of Phase II
NCT02538510		https://clinicaltrials.gov/ct2/show/NCT02538510	Active, not recruiting	I/II	50	2+		99	N/A (no biomarker given)	No restrictions	18+	1	USA		Single group assignment	Combination therapy	No	Yes (secondary outcome measure)	Phase I is run in, Phase II is expansion
NCT02718066		https://clinicaltrials.gov/ct2/show/NCT02718066	Active, not recruiting	Ib/II	96	3		86	EGFR, ALK	>= 1 (NSCLC with EGFR/ALK aberrations); no restrictions (other cancers)	18+	6	USA		Single group assignment	Combination therapy	Yes (dose escalation in Phase I, MTD and/or RP2D in Phase II)	No (note: secondary outcome is efficacy outcome response rate)	Phase Ib is dose escalation to determine the MTD and/or RP2D, Phase II is cohort expansion using the MTD and/or RP2D
NCT02805660		https://clinicaltrials.gov/ct2/show/NCT02805660	Terminated	I/II	83	2+		43	HDAC, PD-L1	Standard therapies are not effective or do not exist	18+	15	USA		Sequential assignment	Combination therapy	Yes (dose escalation in Phase I, RP2D in Phase II)	Yes	Phase I is dose escalation to determine the RP2D, Phase II is cohort expansion using the RP2D
NCT03266159		https://clinicaltrials.gov/ct2/show/NCT03266159	Withdrawn	I/II	0	5+		34	H/K/NRAS	>= 1 (with exceptions)	18+				Sequential assignment	Combination therapy	Yes (dose escalation in Part 1, recommended dose in Part 2)	Yes (for both phases)	Part 1 is dose escalation to determine MTD and recommended dose, Part 2 investigates the efficacy of the recommended dose
NCT02352844		https://clinicaltrials.gov/ct2/show/NCT02352844	Completed	II	12	>1	1	23	TSC1, TSC2, NF1, NF2, or STK11	>= 1	18+	1	USA	Naïve pooling	Single group assignment	Monotherapy	No	No (but primary outcome is Response Rate)
NCT01078662		https://clinicaltrials.gov/ct2/show/NCT01078662	Active, not recruiting	II	298	4+		161	BRCA1/2	Standard therapies are not effective or do not exist	18+	9	Australia, Germany, Israel, Spain, Sweden		Single group assignment	Monotherapy	No (standard dose that can be reduced in exceptional cases)	Yes (secondary outcome measure)
NCT03525795	ORIOn-E	https://clinicaltrials.gov/ct2/show/NCT03525795	Completed	I/II	24	4+	4	19	PD-L1	>= 1 (with exceptions)	18+	3	USA		Single group assignment	Monotherapy	Yes (dose exploration in Phase I, RP2D in Phase II)	Yes (for Phase II)	Phase I is dose exploration to determine the MTD and RP2D, Phase II is a basket study using the RP2D -- trial terminated before Phase II
NCT02648724	Sym015-01	https://clinicaltrials.gov/ct2/show/NCT02648724	Completed	Ia/IIa	57	>1	3	58	MET, METex14, KRAS	Standard therapies are not effective or do not exist	18+	27	USA, Denmark, Hong Kong, Korea, Spain, Taiwan	Within basket	Parallel assignment	Monotherapy	Yes (dose escalation in Part 1, RP2D in Part 2)	Yes (for Part 2)	Part 1 is dose escalation to determine the RP2D, Part 2 is dose expansion using the RP2D
NCT02201212		https://clinicaltrials.gov/ct2/show/NCT02201212	Completed	II	30	>1	1	58	TSC1/2, MTOR	No restrictions	18+	2	USA	Naïve pooling	Single group assignment	Monotherapy	No	Yes
NCT02383927	RUN-HN	https://clinicaltrials.gov/ct2/show/NCT02383927	Completed	II	63	2+	3	69	HRAS	Standard therapies are not effective or do not exist	18+	35	USA, Belgium, France, Germany, Greece, Italy, Korea, Netherlands, Spain, UK	Within basket	Simon's two stage, parallel assignment	Monotherapy	No	Yes
NCT00154388		https://clinicaltrials.gov/ct2/show/NCT00154388; https://doi.org/10.1158/1078-0432.ccr-07-4575	Completed	II	185	>1	24	72	KIT, PDGFRA, PDGFRB	Standard therapies are not effective or do not exist	15-70			Within basket	Parallel assignment	Monotherapy	No	No, but primary endpoint is tumor response
NCT00031915		https://clinicaltrials.gov/ct2/show/NCT00031915; https://doi.org/10.1200/jco.2008.20.5054	Completed	II	190	2+	10	60	KIT, PDGFR-α/β	>= 1 and no further available therapy options	10+	10	USA	Bayesian hierarchical model	Single group assignment	Monotherapy	Yes (dosing regimen depends on body surface area)	No, but CBR is a primary endpoint
NCT00918320	TOTEM2	https://clinicaltrials.gov/ct2/show/NCT00918320; https://doi.org/10.1200/jco.2012.30.15_suppl.9517	Completed	II	129	3+	3	75	N/A (no biomarker given)	>= 1	6 months to ≤20 years	1	France	Within basket	Simon's two stage, single group assignment	Combination therapy	No	Yes
NCT03003195	P10s-PADRE	https://clinicaltrials.gov/ct2/show/NCT03003195	Withdrawn	I/II	0	>1		49	N/A (no biomarker given)	No restrictions	18+	1	USA		Single group assignment	Monotherapy	No	No (primary outcome is # of patients with immune response)	Vaccine intervention
NCT04383210	CRESTONE	https://clinicaltrials.gov/ct2/show/NCT04383210	Active, not recruiting	II	75	13+		34	NRG1	>= 1 and no further available therapy options	18+	42	USA, Australia, Canada, Korea		Parallel assignment	Monotherapy	No	Yes
NCT04205227		https://clinicaltrials.gov/ct2/show/NCT04205227	Recruiting	Ib/IIa	130	3+		57	N/A (no biomarker given)	>= 1 (Melanoma, Pancreatic); >= 1 with exceptions (Sarcoma); no restrictions (Ovarian)	18-80	4	USA, Australia		Single group assignment	Combination therapy	Yes (dose escalation in Part A, RP2D in Part B)	Yes	Part A is dose escalation to determine the RP2D, Part B is dose expansion using the RP2D
NCT05103358	PRECISION 1	https://clinicaltrials.gov/ct2/show/NCT05103358	Recruiting	II	120	>1		47	TSC1/2	No further available treatements or do not exist	12+	82	USA		Single group assignment	Monotherapy	No	Yes
NCT02811497	METADUR	https://clinicaltrials.gov/ct2/show/NCT02811497; http://dx.doi.org/10.1136/jitc-2020-000883	Completed	II	28	3	3	48	RAS, ER+/HER2-	1-2 (ovarian cancer); 2-5 (breast cancer); standard therapies are not effective or do not exist (colorectal carcinoma)	18+	1	Canada	Within basket	Single group assignment	Combination therapy	Yes (two different dosing regmins investigated)	Yes	Two dosing regimens investigated (see cited article)
NCT02915432	POLARIS-02	https://clinicaltrials.gov/ct2/show/NCT02915432; https://doi.org/10.1093/annonc/mdz197; https://doi.org/10.1200/jco.20.02712	Active, not recruiting	Ib/II	401	4		65	N/A (no biomarker given)	>= 2 (Advanced Nasopharyngeal carcinoma); >= 1 (other cancers)	18-75	23	China		Factorial assignment	Monotherapy	Yes (dose exploration in Phase Ib, RP2D in Phase II)	Yes	Phase Ib is dose exploration to determine the RP2D, Phase II assess efficacy using the RP2D
NCT03767075	BoB (Basket of Baskets)	https://clinicaltrials.gov/ct2/show/NCT03767075	Recruiting	II	1000	>1		96	BRCA1/2, MLH1, MSH2/6, PMS2, POLE, POLD1, PDL1, hypermutated tumors, mutations in DNA-repair genes	>= 1 (with exceptions)	18+	6	France, Germany, Netherlands, Spain, Sweden, UK		Single group assignment	Monotherapy	No	Yes	Platform trial referred to as a multi-basket trial, but current design has only one module (one drug) in Part B (iBASKET) which resembles a basket trial
NCT04779151	NIRADO	https://clinicaltrials.gov/ct2/show/NCT04779151	Recruiting	II	112	7+		72	ARID1A, ARID2, ATM, BARD1, BRCA1/2, BRIP1, CDK12, CHEK2, FANCA, IDH1/2, NBN, PALB2, PBRM1, RAD51C/D, FANCA, NBN, RAD51, RAD54L, SMARCA4	>= 1 (all cancers); <= 3 (Metastatic cancers); <= 2 (Gastric, Gastro-esophageal, Metastatic Head and Neck, Biliary tract/Pancreatic ductal carcinomas); No max restrictions (Urothelial Bladder cancer, CCRC, other cancers)	18+	1	France		Parallel assignment	Combination therapy	No	Yes
NCT04171700	LODESTAR	https://clinicaltrials.gov/ct2/show/NCT04171700	Terminated	II	83	>1		33	BRCA1/2, PALB2, RAD51C/D, BARD1, BRIP1, FANCA, NBN, RAD51/B	>= 1	18+	19	USA		Single group assignment	Monotherapy	No	Yes
NCT01970540		https://clinicaltrials.gov/ct2/show/NCT01970540	Completed	I	122	10	2	76	N/A (no biomarker given)	No restrictions	18-75	7	Spain, UK	Within basket	Single group assignment	Combination therapy	Yes (dose escalation in firt part, recommended dose in the second part)	No, but ORR can be derived from one of the secondary outcomes (best overall tumor response)	First part is dose escalation to determine the MTD and recommended dose (Cohort A), second part is expansion using the recommended dose (Cohort B)
NCT03339843	MiMe-A	https://clinicaltrials.gov/ct2/show/NCT03339843	Active, not recruiting	II	85	5	5	52	N/A (no biomarker given)	>= 1	18+	11	Belgium, France		Sequential assignment	Monotherapy	No	No, but one primary endpoint is a therapy success rate which includes CR or PR or SD
NCT03525392		https://clinicaltrials.gov/ct2/show/NCT03525392	Terminated	I/II	14	6+		36	NTSR1	>= 1 and no further available therapy options	18+	8	USA, Belgium, France, Netherlands, Switzerland		Simon's two stage design, single group assignment	Monotherapy	Yes (dose escalation in Phase I)	Yes	Phase I is dose escalation, no details provided on planned design of Phase II due to early termination
NCT02576431	NAVIGATE	https://clinicaltrials.gov/ct2/show/NCT02576431	Recruiting	II	204	7+		122	NTRK 1/2/3	>= 1 (with exceptions)	18+	160	USA, Argentina, Australia, Belgium, Brazil, Canada, China, Colombia, Czechia, Denmark, France, Germany, Greece, Hungary, India, Ireland, Italy, Japan, Korea, Norway, Poland, Portugal, Russia, Singapore, Slovakia, Spain, Sweden, Taiwan, Turkey, Ukraine, UK		Parallel assignment	Monotherapy	No	Yes
NCT02637687	SCOUT	https://clinicaltrials.gov/ct2/show/NCT02637687	Recruiting	I/II	155	>1		130	NTRK 1/2/3	>= 1 (with exceptions)	<21	51	USA, Australia, Canada, China, Czechia, Denmark, France, Germany, Ireland, Israel, Italy, Japan, Korea, Netherlands, Poland, Russia, Spain, Sweden, Switzerland, Turkey, Ukraine, UK		Parallel assignment	Monotherapy	Yes (dose escalation in Phase I)	Yes (Phase II)	Phase I is dose exploration to determine the recommended dose, Phase II is expansion to investigate the efficacy
NCT02122913	LOXO-TRK-14001	https://clinicaltrials.gov/ct2/show/NCT02122913	Completed	I	75	>1	1	84	NTRK1/2/3	>= 1 (with exceptions)	18+	8	USA	Naïve pooling	Sequential assignment	Monotherapy	Yes (dose escalation in first part, recommended dose in second part)	Yes (no details to indicate if this is just for the dose expansion phase)	First part is dose escalation phase to determine the recommended dose for dose expansion, second part is expansion phase using the recommended dose
NCT02097810	STARTRK-1	https://clinicaltrials.gov/ct2/show/NCT02097810; https://doi.org/10.1016/s1470-2045(19)30691-6	Completed	I	84	10	1	72	NTRK1, NTRK2, NTRK3, ROS1, or ALK	No restrictions	18+	10	USA, Korea	Naïve pooling	Single group assignment	Monotherapy	Yes (dose escalation for first portion)	Yes (dose expansion portion)	First portion is dose escalation to determine RP2D, second portion is dose expansion to assess safety and efficacy
NCT02568267	STARTRK-2	https://clinicaltrials.gov/ct2/show/NCT02568267	Active, not recruiting	II	534	14+		114	NTRK1/2/3, ROS1, ALK	No restrictions	18+	123	USA, Australia, Belgium, China, France, Germany, Hong Kong, Italy, Japan,Korea, Netherlands, Poland, Singapore, Spain, Taiwan, UK		Parallel assignment	Monotherapy	No	Yes
NCT02650401	STARTRK-NG	https://clinicaltrials.gov/ct2/show/NCT02650401	Active, not recruiting	I/II	69	2+		110	NTRK1/2/3, ROS1, ALK	No restrictions	0-18	40	USA, Canada, China, France, Germany, Hong Kong, Korea, Italy, Spain, Taiwan, UK		Single group assignment	Monotherapy	Yes (dose escalation in Phase I)	Yes (by cohort, no details if this is just for expansion cohorts)	Phase I is dose escalation to determine RP2D, Phase II is expansion
NCT02034981	AcSé (crizotinib)	https://clinicaltrials.gov/ct2/show/NCT02034981	Active, not recruiting	II	246	10+		114	ALK, MET, ROS1, RON	Standard therapies are not effective or do not exist	1+	1	France		Simon's two stage, single group assignment	Monotherapy	No	Yes
NCT02304809	AcSé (vemurafenib)	https://clinicaltrials.gov/ct2/show/NCT02304809	Active, not recruiting	II	216	10+		116	BRAF V600	>= 1 with exceptions (other cancers); >= 2 (HCL)	18+	1	France		Sequential Bayesian, single group assignment	Monotherapy	No	Yes
NCT03012581	AcSé (nivolumab)	https://clinicaltrials.gov/ct2/show/NCT03012581	Active, not recruiting	II	269	6		79	N/A (no biomarker given)	>= 1 (with exceptions)	18+	1	France		Two-stage Bayesian enrichment design, single group assignment	Monotherapy	No	Yes
NCT03012620	AcSé (pemproblizumab)	https://clinicaltrials.gov/ct2/show/NCT03012620	Active, not recruiting	II	334	6+		78	N/A (no biomarker given)	>= 1 (with exceptions)	15+	1	France		Two-stage Bayesian enrichment design, single group assignment	Monotherapy	No	Yes
NCT01848834	KEYNOTE-012	https://clinicaltrials.gov/ct2/show/NCT01848834	Completed	Ib	297	4	4	86	PD-L1	No restrictions	18+			Within basket	Parallel assignment	Monotherapy	Yes (4 cohorts have the same dose, 1 expansion cohort has a different dose)	Yes (for the 4 cohorts receiving the same dose, and separately for the 1 cohort with a different dose)	Expansion cohort for head & neck cancer received a different dose
NCT01876511	KEYSTONE-016	https://clinicaltrials.gov/ct2/show/NCT01876511	Completed	II	113	2+	3	72	MSI+/-	>= 2 (colon cancer); >= 1 (other cancers)	18+	7	USA	Within basket	Green-Dahlberg two stage, parallel assignment	Monotherapy	No	Yes
NCT02054806	KEYNOTE-28	https://clinicaltrials.gov/ct2/show/NCT02054806	Completed	Ib	477	>1	20	87	N/A (no biomarker given)	>= 1 (with exceptions)	18+			Within basket	Single group assignment	Monotherapy	No	Yes	Phase Ib, but does not appear to focus on dose escalation
NCT02332668	KEYNOTE-051	https://clinicaltrials.gov/ct2/show/NCT02332668	Recruiting	I/II	370	2+		123	PD-L1	>= 1 (with exceptions)	6 months - 17 years	19	USA, Australia, Brazil, France, Germany, Israel, Italy, Korea, Sweden, UK		Single group assignment	Monotherapy	Yes (dose escalation in Part 1, pediatric RP2D in Part 2)	Yes	Part 1 is dose escalation to determine the MTD and RP2D, Part 2 further evaluates the safety and efficacy of the pediatric RP2D
NCT02628067	KEYNOTE-158	https://clinicaltrials.gov/ct2/show/NCT02628067	Recruiting	II	1609	10+		131	N/A (no biomarker given)	>= 2 (Colorectal cancer); >= 1 (other cancers)	18+	22	USA, Brazel, Australia, Canada, Columbia, Denmark, France, Germany, Israel, Italy, Korea, Mexico, Netherlands, Norway, Phillippines, Russia, South Africa, Spain, Taiwan		Parallel assignment	Monotherapy	Yes (two different dosing regmins investigated)	Yes	Two different dosing regimens investigated
NCT03017521	K-BASKET (TAS-117)	https://clinicaltrials.gov/ct2/show/NCT03017521; https://doi.org/10.1007/s10637-021-01085-7	Completed	II	13	8	1	26	PI3K/AKT	>= 1	19+	1	Korea	Within basket	Single group assignment	Monotherapy	Yes (different dosing regimens for GI cancers and non-GI cancers)	Yes	One of two basket trials in the K-BASKET study
NCT03491345	K-BASKET (avelumab)	https://clinicaltrials.gov/ct2/show/NCT03491345	Active, not recruiting	II	60	>1		65	PD-L1, EBV, MSI-H, POLE/POLD1	>= 1	20+	1	Korea		Single group assignment	Monotherapy	No	Yes	One of two basket trials in the K-BASKET study
NCT04439136	NCI-MATCH (Subprotocol B)	https://clinicaltrials.gov/ct2/show/NCT04439136; https://clinicaltrials.gov/ct2/show/NCT02465060; https://doi.org/10.1002/cpt.285	Active, not recruiting	II	40	>1		66	HER2	>= 1 (with exceptions) and no further available therapy options	18+	1	USA		Simon's two-stage desing, single group assignment	Monotherapy	No	Yes	Part of NCI-MATCH study (NCI-MATCH Screening Trial: NCT02465060)
NCT04439266	NCI-MATCH (Subprotocol F)	https://clinicaltrials.gov/ct2/show/NCT04439266; https://clinicaltrials.gov/ct2/show/NCT02465060; https://doi.org/10.1002/cpt.285	Active, not recruiting	II	5	>1		125	ALK	>= 1 (with exceptions) and no further available therapy options	18+	1	USA		Simon's two-stage desing, single group assignment	Monotherapy	No	Yes	Part of NCI-MATCH study (NCI-MATCH Screening Trial: NCT02465060)
NCT04439253	NCI-MATCH (Subprotocol G)	https://clinicaltrials.gov/ct2/show/NCT04439253; https://clinicaltrials.gov/ct2/show/NCT02465060; https://doi.org/10.1002/cpt.285	Active, not recruiting	II	4	>1		125	ROS1	>= 1 (with exceptions) and no further available therapy options	18+	1	USA		Simon's two-stage desing, single group assignment	Monotherapy	No	Yes	Part of NCI-MATCH study (NCI-MATCH Screening Trial: NCT02465060)
NCT04439292	NCI-MATCH (Subprotocol H)	https://clinicaltrials.gov/ct2/show/NCT04439292; https://clinicaltrials.gov/ct2/show/NCT02465060; https://doi.org/10.1002/cpt.285	Active, not recruiting	II	35	>1		99	BRAF V600E/K/R/D	>= 1 (with exceptions) and no further available therapy options	18+	1	USA		Simon's two-stage desing, single group assignment	Combination therapy	No	Yes	Part of NCI-MATCH study (NCI-MATCH Screening Trial: NCT02465060)
NCT04439175	NCI-MATCH (Subprotocol I)	https://clinicaltrials.gov/ct2/show/NCT04439175; https://clinicaltrials.gov/ct2/show/NCT02465060; https://doi.org/10.1002/cpt.285	Active, not recruiting	II	70	>1		58	PIK3CA	>= 1 (with exceptions) and no further available therapy options	18+	1	USA		Simon's two-stage desing, single group assignment	Monotherapy	No	Yes	Part of NCI-MATCH study (NCI-MATCH Screening Trial: NCT02465060)
NCT04439149	NCI-MATCH (Subprotocol N)	https://clinicaltrials.gov/ct2/show/NCT04439149; https://clinicaltrials.gov/ct2/show/NCT02465060; https://doi.org/10.1002/cpt.285	Active, not recruiting	II	35	>1		94	PTEN, PI3K-beta	>= 1 (with exceptions) and no further available therapy options	18+	1	USA		Simon's two-stage desing, single group assignment	Monotherapy	No	Yes	Part of NCI-MATCH study (NCI-MATCH Screening Trial: NCT02465060)
NCT04439188	NCI-MATCH (Subprotocol P)	https://clinicaltrials.gov/ct2/show/NCT04439188; https://clinicaltrials.gov/ct2/show/NCT02465060; https://doi.org/10.1002/cpt.285	Active, not recruiting	II	35	>1		94	PTEN, PI3K-beta	>= 1 (with exceptions) and no further available therapy options	18+	1	USA		Simon's two-stage desing, single group assignment	Monotherapy	No	Yes	Part of NCI-MATCH study (NCI-MATCH Screening Trial: NCT02465060)
NCT04439110	NCI-MATCH (Subprotocol Q)	https://clinicaltrials.gov/ct2/show/NCT04439110; https://clinicaltrials.gov/ct2/show/NCT02465060; https://doi.org/10.1002/cpt.285	Active, not recruiting	II	38	>1		44	HER2	>= 1 (with exceptions) and no further available therapy options	18+	1	USA		Simon's two-stage desing, single group assignment	Monotherapy	No	Yes	Part of NCI-MATCH study (NCI-MATCH Screening Trial: NCT02465060)
NCT04439279	NCI-MATCH (Subprotocol R)	https://clinicaltrials.gov/ct2/show/NCT04439279; https://clinicaltrials.gov/ct2/show/NCT02465060; https://doi.org/10.1002/cpt.285	Active, not recruiting	II	35	>1		44	BRAF, MEK1/2	>= 1 (with exceptions) and no further available therapy options	18+	1	USA		Simon's two-stage desing, single group assignment	Monotherapy	No	Yes	Part of NCI-MATCH study (NCI-MATCH Screening Trial: NCT02465060)
NCT04439318	NCI-MATCH (Subprotocol S1)	https://clinicaltrials.gov/ct2/show/NCT04439318; https://clinicaltrials.gov/ct2/show/NCT02465060; https://doi.org/10.1002/cpt.285	Active, not recruiting	II	70	>1		92	NF1, MEK1/2	>= 1 (with exceptions) and no further available therapy options	18+	1	USA		Simon's two-stage desing, single group assignment	Monotherapy	No	Yes	Part of NCI-MATCH study (NCI-MATCH Screening Trial: NCT02465060)
NCT04439357	NCI-MATCH (Subprotocol S2)	https://clinicaltrials.gov/ct2/show/NCT04439357; https://clinicaltrials.gov/ct2/show/NCT02465060; https://doi.org/10.1002/cpt.285	Active, not recruiting	II	35	>1		88	GNAQ, GNA11, MEK1/2	>= 1 (with exceptions) and no further available therapy options	18+	1	USA		Simon's two-stage desing, single group assignment	Monotherapy	No	Yes	Part of NCI-MATCH study (NCI-MATCH Screening Trial: NCT02465060)
NCT04439331	NCI-MATCH (Subprotocol U)	https://clinicaltrials.gov/ct2/show/NCT04439331; https://clinicaltrials.gov/ct2/show/NCT02465060; https://doi.org/10.1002/cpt.285	Active, not recruiting	II	35	>1		94	NF2, FAK	>= 1 (with exceptions) and no further available therapy options	18+	1	USA		Simon's two-stage desing, single group assignment	Monotherapy	No	Yes	Part of NCI-MATCH study (NCI-MATCH Screening Trial: NCT02465060)
NCT04439240	NCI-MATCH (Subprotocol W)	https://clinicaltrials.gov/ct2/show/NCT04439240; https://clinicaltrials.gov/ct2/show/NCT02465060; https://doi.org/10.1002/cpt.285; https://doi.org/10.1200/jco.19.02630	Completed	II	52	16	1	50	FGFR 1-3 mutation or translocation	>= 1 (with exceptions) and no further available therapy options	18+	1	USA	Naïve pooling	Simon's two-stage desing, single group assignment	Monotherapy	No	Yes	Part of NCI-MATCH study (NCI-MATCH Screening Trial: NCT02465060)
NCT04439305	NCI-MATCH (Subprotocol X)	https://clinicaltrials.gov/ct2/show/NCT04439305; https://clinicaltrials.gov/ct2/show/NCT02465060; https://doi.org/10.1002/cpt.285	Withdrawn	II	0	>1		29	DDR2	>= 1 (with exceptions) and no further available therapy options	18+	1	USA		Simon's two-stage desing, single group assignment	Monotherapy	No	Yes	Part of NCI-MATCH study (NCI-MATCH Screening Trial: NCT02465060)
NCT04439123	NCI-MATCH (Subprotocol Y)	https://clinicaltrials.gov/ct2/show/NCT04439123; https://clinicaltrials.gov/ct2/show/NCT02465060; https://doi.org/10.1002/cpt.285	Active, not recruiting	II	35	>1		43	AKT	>= 1 (with exceptions) and no further available therapy options	18+	1	USA		Simon's two-stage desing, single group assignment	Monotherapy	No	Yes	Part of NCI-MATCH study (NCI-MATCH Screening Trial: NCT02465060)
NCT04439344	NCI-MATCH (Subprotocol Z1A)	https://clinicaltrials.gov/ct2/show/NCT04439344; https://clinicaltrials.gov/ct2/show/NCT02465060; https://doi.org/10.1002/cpt.285	Active, not recruiting	II	53	>1		37	NRAS	>= 1 (with exceptions) and no further available therapy options	18+	1	USA		Simon's two-stage desing, single group assignment	Monotherapy	No	Yes	Part of NCI-MATCH study (NCI-MATCH Screening Trial: NCT02465060)
NCT04439201	NCI-MATCH (Subprotocol Z1B)	https://clinicaltrials.gov/ct2/show/NCT04439201; https://clinicaltrials.gov/ct2/show/NCT02465060; https://doi.org/10.1002/cpt.285	Active, not recruiting	II	70	>1		86	CCND1/2/3, CDK4/6	>= 1 (with exceptions) and no further available therapy options	18+	1	USA		Simon's two-stage desing, single group assignment	Monotherapy	No	Yes	Part of NCI-MATCH study (NCI-MATCH Screening Trial: NCT02465060)
NCT04439214	NCI-MATCH (Subprotocol Z1D)	https://clinicaltrials.gov/ct2/show/NCT04439214; https://clinicaltrials.gov/ct2/show/NCT02465060; https://doi.org/10.1002/cpt.285	Completed	II	47	7+	1	49	MMR deficiency	>= 1 (with exceptions) and no further available therapy options	18+	1	USA	Naïve pooling	Simon's two-stage desing, single group assignment	Monotherapy	No	Yes	Part of NCI-MATCH study (NCI-MATCH Screening Trial: NCT02465060)
NCT05490771	NCI-MATCH (Subprotocol Z1F)	https://clinicaltrials.gov/ct2/show/NCT05490771; https://clinicaltrials.gov/ct2/show/NCT02465060; https://doi.org/10.1002/cpt.285	Active, not recruiting	II	35	>1		60	PIK3CA, PIK3	>= 1 (with exceptions) and no further available therapy options	18+	1	USA		Simon's two-stage desing, single group assignment	Monotherapy	No	Yes	Part of NCI-MATCH study (NCI-MATCH Screening Trial: NCT02465060)
NCT04439227	NCI-MATCH (Subprotocol Z1I)	https://clinicaltrials.gov/ct2/show/NCT04439227; https://clinicaltrials.gov/ct2/show/NCT02465060; https://doi.org/10.1002/cpt.285	Active, not recruiting	II	35	>1		76	BRCA1/2, WEE1	>= 1 (with exceptions) and no further available therapy options	18+	1	USA		Simon's two-stage desing, single group assignment	Monotherapy	No	Yes	Part of NCI-MATCH study (NCI-MATCH Screening Trial: NCT02465060)
NCT03213678	Pediatric MATCH (samotolisib)	https://clinicaltrials.gov/ct2/show/NCT03213678; https://clinicaltrials.gov/ct2/show/NCT03155620	Recruiting	II	24	>1		87	TSC, PI3K/MTOR	>= 1 (with exceptions)	1-21	129	USA		Single group assignment	Monotherapy	Yes (3 different dosing regimens depending on body surface area)	Yes (reponse rate)	Part of Pediatric MATCH study (Pediatric MATCH Screening Trial: NCT03155620)
NCT04320888	Pediatric MATCH (selpercatinib)	https://clinicaltrials.gov/ct2/show/NCT04320888; https://clinicaltrials.gov/ct2/show/NCT03155620	Recruiting	II	49	>1		85	RET	>= 1 (with exceptions)	1-21	173	USA		Single group assignment	Monotherapy	No dosing information provided	Yes	Part of Pediatric MATCH study (Pediatric MATCH Screening Trial: NCT03155620)
NCT04284774	Pediatric MATCH (tipifarnib)	https://clinicaltrials.gov/ct2/show/NCT04284774; https://clinicaltrials.gov/ct2/show/NCT03155620	Recruiting	II	49	>1		87	HRAS	>= 1 (with exceptions)	1-21	173	USA		Single group assignment	Monotherapy	No dosing information provided	Yes	Part of Pediatric MATCH study (Pediatric MATCH Screening Trial: NCT03155620)
NCT04195555	Pediatric MATCH (ivosidenib)	https://clinicaltrials.gov/ct2/show/NCT04195555; https://clinicaltrials.gov/ct2/show/NCT03155620	Recruiting	II	49	>1		67	IDH1	>= 1 (with exceptions)	1-21	174	USA		Single group assignment	Monotherapy	No dosing information provided	Yes	Part of Pediatric MATCH study (Pediatric MATCH Screening Trial: NCT03155620)
NCT03220035	Pediatric MATCH (vemurafenib)	https://clinicaltrials.gov/ct2/show/NCT03220035; https://clinicaltrials.gov/ct2/show/NCT03155620	Active, not recruiting	II	4	>1		73	BRAF V600	>= 1 (with exceptions)	1-21	117	USA		Single group assignment	Monotherapy	Yes (relative based on body surface area)	Yes	Part of Pediatric MATCH study (Pediatric MATCH Screening Trial: NCT03155620)
NCT03210714	Pediatric MATCH (erdafitinib)	https://clinicaltrials.gov/ct2/show/NCT03210714; https://clinicaltrials.gov/ct2/show/NCT03155620	Active, not recruiting	II	49	>1		86	FGFR1/2/3/4	>= 1 (with exceptions)	1-21	118	USA		Single group assignment	Monotherapy	No dosing information provided	Yes (response rate)	Part of Pediatric MATCH study (Pediatric MATCH Screening Trial: NCT03155620)
NCT03213652	Pediatric MATCH (ensartinib)	https://clinicaltrials.gov/ct2/show/NCT03213652; https://clinicaltrials.gov/ct2/show/NCT03155620	Recruiting	II	98	>1		87	ALK, ROS1	>= 1 (with exceptions)	1-21	125	USA		Single group assignment	Monotherapy	No dosing information provided	Yes	Part of Pediatric MATCH study (Pediatric MATCH Screening Trial: NCT03155620)
NCT03213704	Pediatric MATCH (larotrectinib)	https://clinicaltrials.gov/ct2/show/NCT03213704; https://clinicaltrials.gov/ct2/show/NCT03155620	Recruiting	II	49	>1		87	NTRK1/2/3	>= 1 (with exceptions)	1-21	125	USA		Single group assignment	Monotherapy	No dosing information provided	Yes	Part of Pediatric MATCH study (Pediatric MATCH Screening Trial: NCT03155620)
NCT03526250	Pediatric MATCH (palbociclib)	https://clinicaltrials.gov/ct2/show/NCT03526250; https://clinicaltrials.gov/ct2/show/NCT03155620	Active, not recruiting	II	49	>1		73	Rb+	>= 1 (with exceptions)	1-21	119	USA		Single group assignment	Monotherapy	No dosing information provided	Yes	Part of Pediatric MATCH study (Pediatric MATCH Screening Trial: NCT03155620)
NCT03698994	Pediatric MATCH (ulixertinib)	https://clinicaltrials.gov/ct2/show/NCT03698994; https://clinicaltrials.gov/ct2/show/NCT03155620	Active, not recruiting	II	20	>1		55	MAPK	>= 1 (with exceptions)	1-21	109	USA		Single group assignment	Monotherapy	Yes (dose escalation)	Yes	Part of Pediatric MATCH study (Pediatric MATCH Screening Trial: NCT03155620)
NCT03233204	Pediatric MATCH (olaparib)	https://clinicaltrials.gov/ct2/show/NCT03233204; https://clinicaltrials.gov/ct2/show/NCT03155620	Active, not recruiting	II	49	>1		81	PARP, DNA damage repair genes	>= 1 (with exceptions)	1-21	114	USA		Single group assignment	Monotherapy	No dosing information provided	Yes	Part of Pediatric MATCH study (Pediatric MATCH Screening Trial: NCT03155620)
NCT03213665	Pediatric MATCH (tazemetostat)	https://clinicaltrials.gov/ct2/show/NCT03213665; https://clinicaltrials.gov/ct2/show/NCT03155620	Active, not recruiting	II	20	>1		70	EZH2, SMARCB1, SMARCA4	>= 1 (with exceptions)	1-21	118	USA		Single group assignment	Monotherapy	Yes (2 different doses depending on CNS involvement or not)	Yes	Part of Pediatric MATCH study (Pediatric MATCH Screening Trial: NCT03155620)
NCT03213691	Pediatric MATCH (selumetinib sulfate)	https://clinicaltrials.gov/ct2/show/NCT03213691; https://clinicaltrials.gov/ct2/show/NCT03155620	Active, not recruiting	II	21	>1		72	MAPK	>= 1 (with exceptions)	1-21	112	USA		Single group assignment	Monotherapy	No	Yes (response rate)	Part of Pediatric MATCH study (Pediatric MATCH Screening Trial: NCT03155620)
NCT05770037	DETERMINE (Treatment Arm 1)	https://clinicaltrials.gov/ct2/show/NCT05770037; https://clinicaltrials.gov/ct2/show/NCT05722886	Recruiting	II/III	30	3+		79	ALK+	>= 1 (with exceptions) and no further available treatements	Child, Adult, Older Adult	26	UK		Single group assignment	Monotherapy	Yes (dose regimen depends on age group/body weight)	Yes	Part of DETERMINE umbrella-basket platform study (DETERMINE Master Screening Protocol: NCT05722886)
NCT05770102	DETERMINE (Treatment Arm 2)	https://clinicaltrials.gov/ct2/show/NCT05770102; https://clinicaltrials.gov/ct2/show/NCT05722886	Not yet recruiting	II/III	30	3+		79	TMB-high, MSI-high, CMMRD	>= 1 (with exceptions) and no further available treatements	Child, Adult, Older Adult	26	UK		Single group assignment	Monotherapy	Yes (dose regimen depends on age group/body weight)	Yes	Part of DETERMINE umbrella-basket platform study (DETERMINE Master Screening Protocol: NCT05722886)
NCT05770544	DETERMINE (Treatment Arm 3)	https://clinicaltrials.gov/ct2/show/NCT05770544; https://clinicaltrials.gov/ct2/show/NCT05722886	Recruiting	II/III	30	3+		79	ROS1+	>= 1 (with exceptions) and no further available treatements	Child, Adult, Older Adult	26	UK		Single group assignment	Monotherapy	Yes (dose regimen depends on age group/body weight)	Yes	Part of DETERMINE umbrella-basket platform study (DETERMINE Master Screening Protocol: NCT05722886)
NCT05786716	DETERMINE (Treatment Arm 4)	https://clinicaltrials.gov/ct2/show/NCT05786716; https://clinicaltrials.gov/ct2/show/NCT05722886	Recruiting	II/III	30	9+		80	HER2	>= 1 (with exceptions) and no further available treatements	Child, Adult, Older Adult	26	UK		Single group assignment	Combination therapy	Yes (dose regimen depends on age group/body weight)	Yes	Part of DETERMINE umbrella-basket platform study (DETERMINE Master Screening Protocol: NCT05722886)
NCT05768178	DETERMINE (Treatment Arm 5)	https://clinicaltrials.gov/ct2/show/NCT05768178; https://clinicaltrials.gov/ct2/show/NCT05722886	Recruiting	II/III	30	7+		80	BRAF V600+	>= 1 (with exceptions) and no further available treatements	18+	17	UK		Single group assignment	Combination therapy	No	Yes	Part of DETERMINE umbrella-basket platform study (DETERMINE Master Screening Protocol: NCT05722886)
NCT01831726	SIGNATURE (dovitinib)	https://clinicaltrials.gov/ct2/show/NCT01831726; https://doi.org/10.18632/oncotarget.25109	Completed	II	80	2+	1	29	FGFR 1-3, PDGFRA/B, VEGFR1-2, FLT3, cKIT, RET, TrkA, CSF-1R	>= 1 (with exceptions)	18+	49	USA	Bayesian hierarchical model with clustering	Bayesian adaptive, Single group assignment	Monotherapy	No	Yes	One of eight basket trials in the SIGNATURE study
NCT01833169	SIGNATURE (BKM120)	https://clinicaltrials.gov/ct2/show/NCT01833169; https://doi.org/10.18632/oncotarget.25109	Completed	II	146	2+	1	43	PI3K	>= 1 (with exceptions)	18+	59	USA	Bayesian hierarchical model with clustering	Bayesian adaptive, Single group assignment	Monotherapy	No	Yes	One of eight basket trials in the SIGNATURE study
NCT01885195	SIGNATURE (MEK162)	https://clinicaltrials.gov/ct2/show/NCT01885195; https://doi.org/10.18632/oncotarget.25109	Completed	II	110	2+	3	43	RAF, RAS, NF1, MEK	>= 1 (with exceptions)	18+	68	USA	Bayesian hierarchical model with clustering	Bayesian adaptive, Single group assignment	Monotherapy	No	Yes	One of eight basket trials in the SIGNATURE study
NCT01981187	SIGNATURE (LGX818)	https://clinicaltrials.gov/ct2/show/NCT01981187; https://doi.org/10.18632/oncotarget.25109	Terminated	II	12	2+		22	BRAFV600	>= 1 (with exceptions)	18+	13	USA		Bayesian adaptive, Single group assignment	Monotherapy	No	Yes	One of eight basket trials in the SIGNATURE study
NCT02002689	SIGNATURE (LDE225)	https://clinicaltrials.gov/ct2/show/NCT02002689; https://doi.org/10.18632/oncotarget.25109	Terminated	II	10	2+		14	PTCH1/SMO	>= 1 (with exceptions)	18+	10	USA		Bayesian adaptive, Single group assignment	Monotherapy	No	Yes	One of eight basket trials in the SIGNATURE study
NCT02160041	SIGNATURE (BGJ398)	https://clinicaltrials.gov/ct2/show/NCT02160041; https://doi.org/10.18632/oncotarget.25109	Terminated	II	84	2+		46	FGFR	>= 1 (with exceptions)	18+	56	USA		Bayesian adaptive, Single group assignment	Monotherapy	No	Yes	One of eight basket trials in the SIGNATURE study
NCT02186821	SIGNATURE (ceritinib)	https://clinicaltrials.gov/ct2/show/NCT02186821; https://doi.org/10.18632/oncotarget.25109	Terminated	II	47	2+		40	ALK, ROS1	>= 1 (with exceptions)	18+	21	USA		Bayesian adaptive, Single group assignment	Monotherapy	No	Yes	One of eight basket trials in the SIGNATURE study
NCT02187783	SIGNATURE (LEE011)	https://clinicaltrials.gov/ct2/show/NCT02187783; https://doi.org/10.18632/oncotarget.25109	Completed	II	106	2+	1	42	CDK4/6, CCND1/3/2A	>= 1 (with exceptions)	18+	61	USA	Bayesian hierarchical model with clustering	Bayesian adaptive, Single group assignment	Monotherapy	No	Yes	One of eight basket trials in the SIGNATURE study
ACTRN12610000796088	PARAGON	https://www.anzctr.org.au/Trial/Registration/TrialReview.aspx?ACTRN=12610000796088	Completed	II	333	5+	8		Estrogen or progesterone receptor-positive	>= 1 (miscellaneous sarcomas); no restrictions (other cancers)	18+		Australia, Belgium, New Zealand, UK	Within basket	Single group assignment	Monotherapy	No	Yes	Seven separate prospective phase 2 studies were included within this protocol, each investigating the effect of anastrozole in patients with ER+ or PR+ gynecological cancers
UMIN000033182	TMB-H basket	https://center6.umin.ac.jp/cgi-open-bin/ctr_e/ctr_view.cgi?recptno=R000037839; https://rctportal.niph.go.jp/en/detail?trial_id=UMIN000033182	Active, not recruiting	II	70	9+			TMB-H	<= 1 (Gastric cancer); >= 1 (other cancers)	20+		Japan		Single group assignment	Monotherapy	No	Yes	Part of GOZILA study
JapicCTI-132287		https://doi.org/10.1007/s10637-017-0504-6	Completed	II	71	3	6		PIK3CA	<= 4 (ovarian cancer); <= 3 (endometrial/cervical); >= 1 (other cancers)	20+	13	Japan	Within basket	Single group assignment	Monotherapy	No	Yes
JapicCTI-194707	HERALD	https://ct.ganjoho.jp/category/ttrial/JapicCTI-194707; https://rctportal.niph.go.jp/en/detail?trial_id=jRCT2080224635; https://doi.org/10.1200/JCO.2020.38.15_suppl.TPS3650	Active, not recruiting	II	60	>1			HER360/8201	>= 1	20+	7	Japan	Bayesian model considering the potential heterogeneity across cancer types	Single group assignment	Monotherapy	No	Yes
JapicCTI-194624; jRCT2080224555	TiFFANY	https://ct.ganjoho.jp/category/ttrial/JapicCTI-194624; https://jrct.niph.go.jp/en-latest-detail/jRCT2080224555	Completed	II	26	>1		45	FGFR	Standard therapies are not effective or do not exist	20+	8	Japan		Single group assignment	Monotherapy	No	Yes
JapicCTI-194851; jRCT2080224774	Barossa	https://ct.ganjoho.jp/category/ttrial/JapicCTI-194851; https://jrct.niph.go.jp/latest-detail/jRCT2080224774	Ongoing	II	52	2+			ROS1+	No restrictions	20+	11	Japan		Single group assignment	Monotherapy	No	Yes
jRCT2031180150	JUPITER	https://jrct.niph.go.jp/en-latest-detail/jRCT2031180150; https://doi.org/10.1097/md.0000000000021457	Active, not recruiting	II	38	4+		25	HER2	>= 1 (with exceptions)	20+	7	Japan		Single group assignment	Combination therapy	No	Yes
jRCT2011200023		https://rctportal.niph.go.jp/en/detail?trial_id=jRCT2011200023; https://ct.ganjoho.jp/category/ttrial/jRCT2011200023	Recruiting	II	60	3+			BRCA	1-2 (Biliary tract cancer, pancreatic cancer); >= 1 with exceptions (other cancers)	20+		Japan		Single group assigment	Monotherapy	Yes (patients receive different dosages based on their weight)	Yes	Patients received different doses depending on weight

## Sheet: Data Extraction Guidelines
Data Extraction Guidelines
Basket Trial Inclusion Criteria:
In this systematic review, we classified a study as a basket trial if it met the following criteria:
1. Tests an anticancer therapy on more than one indication/tumor type
2. Investigates only one treatment regimen
3. Includes a binary endpoint (e.g., ORR, CBR)
For basket trials that meet the above criteria, we extract the following data when available:
1. Registry ID (e.g., NCT number for ClinicalTrials.gov)
2. Study acronym
3. Source URL: registries, abstracts, and articles from which the data were extracted
4. Trial status (as of April 2023)
5. Phase
6. N: total sample size (estimated or actual), including all cohorts and all phases/parts of the trial (e.g., both phase I and phase II, even if only phase II is of interest for the basket portion)
7. Number of indications: number of cancer types that affect different parts of the body (e.g., two types of brain tumors are counted as a single indication). We report ">1" for trials that enroll patients with multiple indications without specifying any examples (e.g., reports "solid tumors")
8. Number of baskets: number of indications/cohorts for which the response data (e.g., ORR) are reported separately. We extract this number for completed trials only. For trials that pool all cancer types together, we report the number of baskets as 1
9. Proposed study duration: the proposed (or actual) duration of the study in months. We count the number of calendar months for which the study is active (or estimated to be active), including the first and last month
10. Molecular class: the molecular aberration (e.g., genetic mutation) or protein targeted by the anticancer therapy. We report "N/A (no biomarker given)" for trials that do not report this information
11. Number of prior lines of treatment (LoT): we report the required number of prior lines of treatment as part of the trial inclusion criteria. We report "No restrictions" to indicate that no restrictions were placed on the number of prior LoT, however, trials with this label may still have exclusion criteria restricting the type of prior therapies allowed. For some trials, we list the number of…
12. Age of population
13. Number of clinical centers
14. Geographic location of basket trial: countries with clinical centers
15. Evaluation method: statistical method for how the binary data are analyzed (reported mostly for completed trials). Trials that report a single summary (e.g., ORR) are labeled as using naïve pooling, whereas trials that report separate summaries for each basket are labeled as using a within-basket analysis.
16. Key design features: group assignment and, if applicable, the use of two-stage designs to enroll patients (e.g., Simon's two stage)
17. Type of treatment regimen (e.g., monotherapy vs. combination therapy)
18. Multiple dosing regimens (Y/N): whether multiple dosing regimens were included in any part of the trial. If so, we indicated how different doses were incorporated (e.g., dose escalation stage, different doses to different cohorts)
19. ORR and Endpoint (Y/N): whether ORR is an endpoint (can be primary or secondary). If no, we then indicate what other binary response summary are indicated as an endpoint (e.g., CBR)
20. Notes: general notes relating to the trial (e.g., whether the trial includes multiple parts/phases, if the trial is part of a larger study)
For trials with both a dose exploration phase and a cohort expansion phase (e.g., I/II), we report the data from the entire trial as given on CT.gov (e.g., N, number of indications) and then make a note about the trial design and which parts are applicable for our purposes.
Trials with Multiple Treatment Regimens:
Trials that investigate more than one treatment regimen (e.g., monotherapy and combination therapy, multiple drugs) are excluded from the review including designs that may be classified as a basket design combined with an umbrella and/or platform design. Other trial designs are much more in line with the basket design in which the majority of cohorts receive the same treatment regimen while a sin…
